# Supplementary material for: Women’s knowledge and perception of male circumcision before and after its roll-out in the South African township of Orange Farm from community-based cross-sectional surveys
Source: PLOS journal article supplement (doi:10.1371/journal.pone.0173595), 2017-03-24
Supplement: S1 (10.1371/journal.pone.0173595.s001) [file journal.pone.0173595.s001]

**S1 Table. Knowledge and perception of women of ages 18 to 49 years regarding male circumcision from the samples obtained in 2007, 2010 and 2012 in the South African township of Orange Farm.**

|                                                                                                              | 2007<br>N= 1160 | 2010<br>N=1133 | 2012<br>N=2583 | Total<br>N=4876 | Average proportionate change in prevalence per year with 95%CI and p-value* |
|--------------------------------------------------------------------------------------------------------------|-----------------|----------------|----------------|-----------------|-----------------------------------------------------------------------------|
| <b>Preferences</b>                                                                                           |                 |                |                |                 |                                                                             |
| Generally speaking would you prefer to have sex with a circumcised man rather than with an uncircumcised man |                 |                |                |                 |                                                                             |
| Yes                                                                                                          | 49.8%           | 65.7%          | 73.7%          | 66.1%           | 9.3% (8.0% to 10.7%) p=0.000                                                |
| No/Same/DNK                                                                                                  | 50.2%           | 34.3%          | 26.3%          | 33.9%           |                                                                             |
| Most women prefer circumcised men                                                                            |                 |                |                |                 |                                                                             |
| Agree                                                                                                        | 66.1%           | 71.0%          | 73.7%          | 71.3%           | 2.4% (1.4% to 3.5%) p=0.000                                                 |
| Disagree/DNK                                                                                                 | 33.9%           | 29.0%          | 26.3%          | 28.7%           |                                                                             |
| I prefer to have my male children circumcised                                                                |                 |                |                |                 |                                                                             |
| Yes                                                                                                          | 81.8%           | 93.1%          | 95.8%          | 91.8%           | 3.6% (3.1% to 4.1%) p=0.000                                                 |
| No                                                                                                           | 18.2%           | 6.9%           | 4.2%           | 8.2%            |                                                                             |
| <b>Perception</b>                                                                                            |                 |                |                |                 |                                                                             |
| Circumcision increases pleasure during sex                                                                   |                 |                |                |                 |                                                                             |
| Agree                                                                                                        | 43.5%           | 48.4%          | 59.6%          | 53.2%           | 7.4% (5.8% to 9.2%) p=0.000                                                 |
| Disagree                                                                                                     | 14.7%           | 12.8%          | 14.7%          | 14.2%           | 0.1% (-3.7% to 4.1%) p=0.950                                                |
| DNK                                                                                                          | 38.8%           | 38.8%          | 25.7%          | 32.6%           | -9.7% (-11.6% to -7.8%) p=0.000                                             |
| <b>Acceptability</b>                                                                                         |                 |                |                |                 |                                                                             |
| If I have an uncircumcised partner I would accept that he undergoes circumcision                             |                 |                |                |                 |                                                                             |
| Yes                                                                                                          | 90.8%           | 95.9%          | 93.3%          | 93.3%           | 0.6% (0.2% to 1.1%) p=0.003                                                 |
| No                                                                                                           | 9.2%            | 4.1%           | 6.7%           | 6.7%            |                                                                             |
| If circumcision was offered free at birth, I would have my male children circumcised                         |                 |                |                |                 |                                                                             |
| Yes                                                                                                          | 61.5%           | 69.1%          | 74.0%          | 69.9%           | 4.1% (3.0% to 5.2%) p=0.000                                                 |
| No                                                                                                           | 38.5%           | 30.9%          | 26.0%          | 30.1%           |                                                                             |
| <b>Family and partner support</b>                                                                            |                 |                |                |                 |                                                                             |
| My partner supports circumcision                                                                             |                 |                |                |                 |                                                                             |
| Agree                                                                                                        | 58.7%           | 72.2%          | 75.3%          | 70.6%           | 5.8% (4.7% to 6.9%) p=0.000                                                 |
| Disagree/DNK                                                                                                 | 41.3%           | 27.8%          | 24.7%          | 29.4%           |                                                                             |
| My family supports circumcision                                                                              |                 |                |                |                 |                                                                             |
| Agree                                                                                                        | 57.2%           | 74.1%          | 80.0%          | 73.2%           | 7.9% (6.8% to 9.0%) p=0.000                                                 |
| Disagree/DNK                                                                                                 | 42.8%           | 25.9%          | 20.0%          | 26.8%           |                                                                             |
| <b>Knowledge towards MC</b>                                                                                  |                 |                |                |                 |                                                                             |
| Circumcised men need to use condoms to protect them from STIs and HIV                                        |                 |                |                |                 |                                                                             |
| Agree                                                                                                        | 82.9%           | 86.4%          | 87.9%          | 86.4%           | 1.4% (0.7% to 2.0%) p=0.000                                                 |
| Disagree/DNK                                                                                                 | 17.1%           | 13.6%          | 12.1%          | 13.6%           |                                                                             |

\* Linear trend obtained using Poisson regression controlled for age-group (18-24, 25-34, 35-49 years) and ethnic group.

CI: confidence interval.

STI: sexually transmitted infection

DNK: Don't know
